# Supplementary material
Source: PubMed Central journal article supplement (PMC2850030)
Supplement: pp.109.152603_1.pdf [file pp.109.152603_1.pdf]

## Supplemental Methods

### Modification in SA and ABA analysis

#### 1. For humidity shift experiments

Plant materials were lyophilized and ground to a fine powder in 80% (v/v) methanol containing 1% (v/v) acetic acid (10 ml per g FW of tissue). [ $^2\text{H}_6$ ]ABA (ICON isotopes) and [ $^2\text{H}_6$ ]SA (Sigma) were added as internal standards to a concentration of 10 ng g<sup>-1</sup> FW (ABA) and 100 ng g<sup>-1</sup> FW (SA). The mixture was incubated for 1 h at 4°C with constant rotation and subsequently centrifuged at 3000g for 20 min at 4°C. MeOH in supernatant were removed and water layer were loaded onto a Oasis HLB cartridge (30 mg, 1 cc; Waters). Before sample loading, the cartridges were washed with 1 ml each of methanol and water and equilibrated with 1 ml of water containing 1% AcOH. 10% of this eluent were dried, dissolved into 20  $\mu\text{l}$  of water containing 1% AcOH, and 10  $\mu\text{l}$  were subjected to the determination of SA by liquid chromatography-tandem mass spectrometry (LC-MS/MS). ABA were eluted with 2 ml of 80% MeOH containing 1% AcOH after washing with 1 ml of water containing 1% AcOH. MeOH in this eluent were removed and water layer were loaded onto an Oasis WAX cartridge (30 mg, 1 cc; Waters), ABA were eluted with 2 ml of 80% MeOH containing 1% AcOH after sequential washing with 1 ml of water containing 1% AcOH and 1 ml of MeOH. Before sample loading, cartridges were washed with 1 ml each of MeCN and MeOH, then regenerated with 500  $\mu\text{l}$  of 0.1 M NaOH, and equilibrated with 1 ml of water containing 1% AcOH. The eluent were dried, dissolved into 20  $\mu\text{l}$  of water containing 1% AcOH, and 10  $\mu\text{l}$  were subjected to the determination of ABA by LC-MS/MS.

The LC-MS/MS system consisted of Agilent 1200 (Agilent) and Agilent 6410 (Agilent). LC separations were performed on an zorbax eclipse C18 (2.1 x 50 mm, 1.8  $\mu\text{m}$  particle size; Agilent) at a flow rate of 200  $\mu\text{l min}^{-1}$ . For the analysis of SA, the mobile phase consisted of water containing 0.1% formic acid (solvent A) and MeCN containing 0.1% formic acid (solvent B), and was programmed as follows: a 10 min linear gradient from 3 to 98% solvent B, kept to 15 min at 98%

solvent B, and a 16 min linear gradient from 98 to 3% solvent B, and kept to 20 min at 3% solvent B. The MS/MS conditions were as follows: capillary voltage, 4000 V; gas temperature, 300°C; gas flow, 9 l min<sup>-1</sup>; nebulizer, 30 psi; fragmentor, 100; collision energy, 16.0 V. SA and [<sup>2</sup>H<sub>6</sub>]SA showed almost identical retention times, which were 6.2 min. The MS/MS transitions used for SA determination were m/z 137/93 (as SA) and m/z 141/97 (as [<sup>2</sup>H<sub>6</sub>]SA, in water [<sup>2</sup>H<sub>6</sub>]SA converts almost quantitatively to [<sup>2</sup>H<sub>4</sub>]SA). For the analysis of ABA, the mobile phase consisted of water containing 0.01% AcOH (solvent A) and MeCN containing 0,05% (V/V) acetic acid (solvent B), and was programmed as follows: a 15 min linear gradient from 3 to 50% solvent B, 17 min linear gradient from 50% to 98% solvent B, and kept to 20 min, 21 min linear gradient from 98 to 3% solvent B, and kept to 26 min at 3% solvent B. The water and MeCN used were of LC-MS grade (Kanto Chemical). The MS/MS conditions were as follows: capillary voltage, 4000 V; gas temperature, 300°C; gas flow, 9 l min<sup>-1</sup>; nebulizer, 30 psi; fragmentor, 140; collision energy, 8.0 V. ABA and [<sup>2</sup>H<sub>6</sub>]ABA showed almost identical retention times, which were 10.8 min. The MS/MS transitions used for ABA determination were m/z 263/153 (as ABA) and m/z 269/159 (as [<sup>2</sup>H<sub>6</sub>]ABA).

## 2. Drought stress experiments

Each sample was homogenized with liquid nitrogen, and extracted with 80% MeOH (3mL x 3) before adding of 100ng of deuterated-ABA (d<sub>4</sub>-ABA) as internal standard. After centrifugation at 12,000xg for 10min, the extract was evaporated and partitioned between ethyl acetate and water (pH2.5). The obtained ethyl acetate soluble fraction was purified by a reversed phase HPLC (Intersil ODS C<sub>18</sub>, 4.6 x 150 mm) eluted with 25% acetonitrile containing 1% acetic acid at a flow rate of 0.5 mL min<sup>-1</sup>. Fractions were collected every minute. The fractions eluted at 19 min (ABA) was dried, methylated by adding MeOH and ethereal diazomethane at room temperature for 30 min, and analyzed by a capillary GC-MS using a Hewlett-Packard 5973 mass spectrometer (EI, 70 ev) coupled to a 6890 gas chromatograph fitted with a fused silica capillary column (HP-5, 0.25

mm x 30 m, 0.25 $\mu$ m film thickness). The oven temperature was maintained at 100°C for 2 min, elevated to 260° at a rate of 5°min<sup>-1</sup> and then maintained at 280°. Helium was used as the carrier gas at a flow rate of 1 mL min<sup>-1</sup>. Samples were introduced using an on-column injection mode and analyzed by GC-selected ion monitoring (SIM) method. The level of ABA was calculated by ratio of *m/z* at 190 and 194 for the molecular ion of endogenous ABA and d<sub>4</sub>-ABA, respectively.

### 3. SA for nahG experiment

Salicylic acid and its glucoside were quantified using gas chromatography-mass spectrometry. 100 mg of frozen leaf tissue were extracted twice with 800  $\mu$ l acetone:50 mM citric acid (7:3, v/v) in 2 ml Fast Prep tubes containing ceramic beads using a FastPrep FP 120 tissue homogenizer (Qbiogene, Carlsbad, CA). The samples were spiked with [<sup>2</sup>H<sub>6</sub>]SA as an internal standard (CDN Isotopes, Point-Claire, QC, Canada). After evaporation of the acetone under vacuum the aqueous solutions were extracted twice with 750  $\mu$ l of diethyl ether. SA-glucoside was extracted from the remaining aqueous solution after acidification with 5  $\mu$ l of HCl and hydrolysis at 90°C for 1 hour by diethyl-ether extraction. All samples were then loaded on 1ml Supelclean LC-NH<sub>2</sub> SPE columns (Supelco, Bellefonte, PA). After washing with 1.2 ml chloroform:2-propanol (2:1, v/v) compounds were eluted with 1.5 ml diethyl-ether:formic acid (98:2, v/v). The eluates were then evaporated to dryness under a stream of N<sub>2</sub>, dissolved in 100  $\mu$ l dichloromethane:methanol (8:2, v/v) and derivatized with 2  $\mu$ l Trimethylsilyl-Diazomethane (Aldrich, Oakville, ON, Canada) for 20 minutes. The reaction was stopped by adding 2  $\mu$ l 2M acetic acid in hexane (Schmelz et al., 2004). The resulting methyl esters of SA were analyzed by gas chromatography-mass spectrometry (6890N GC connected to a 5975 mass selective detector, Agilent Technologies, Palo Alto, CA) in isobutene chemical ionization mode following the specifications of Schmelz et al. (2004). The methyl esters were measured using selected-ion monitoring with *m/z* 153 (SA) and *m/z* 157 ([<sup>2</sup>H<sub>6</sub>]SA).

## Suppl. Figure 1

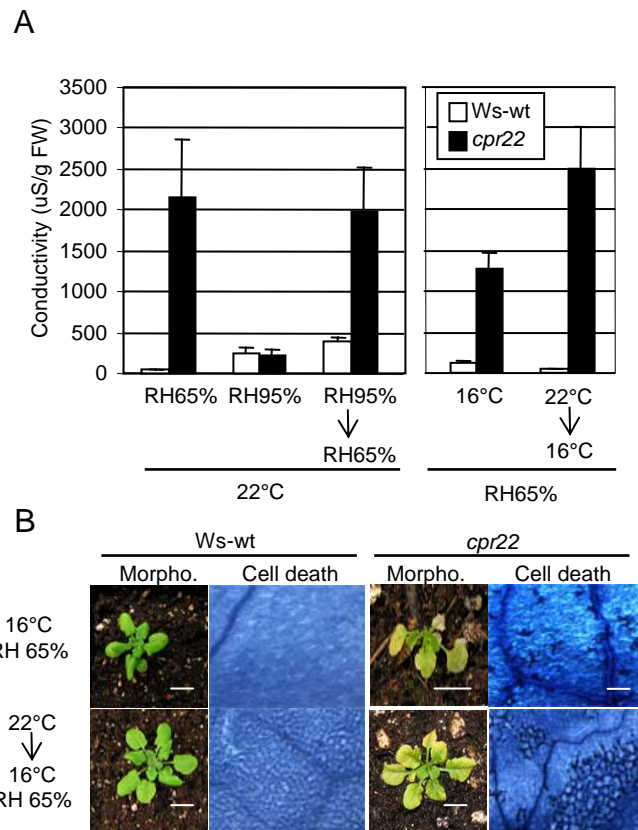

**Supplemental Figure 1.** Humidity and temperature affect spontaneous cell death formation in *cpr22*. (A) Electrolyte leakage of leaf discs from *Ws-wt* and *cpr22* plants grown under 65% RH (22°C) conditions, grown under 95%RH (22°C) conditions, grown under 95% RH (22°C) conditions and shifted to 65% RH (22°C) conditions for 2 days, or grown under 16°C (RH65%) conditions, or grown under 22°C (RH65%) conditions and shifted to 16°C (RH65%) conditions for 2 days. Conductivity data is the average  $\pm$  SE (n=4). Student's T-test shows significant difference between *cpr22* and *Ws-wt* plants. (B) Photographs show morphology, chlorotic phenotypes and spontaneous cell death by Trypan Blue staining of four-week-old *cpr22* and *Ws-wt* plants grown under 16°C (65% RH) conditions, or grown at 22°C (65% RH) conditions and shifted to 16°C (65% RH) conditions for 2 days.

## Suppl. Figure 2

A

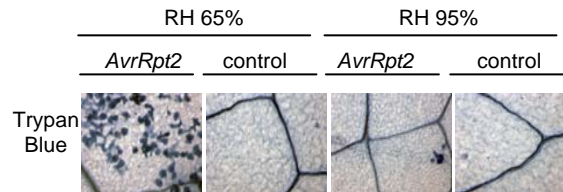

B

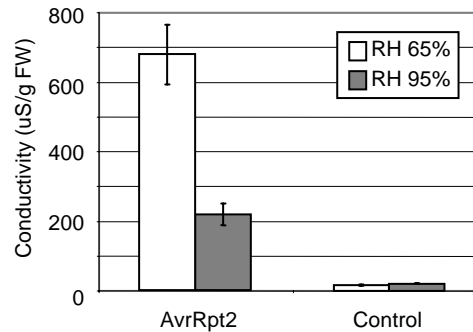

C

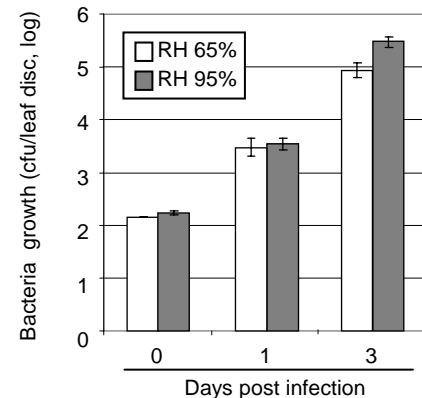

**Supplemental Figure 2.** High RH attenuates HR formation after infection with *Pseudomonas syringae* DC3000 (*AvrRpt2*). (A) Columbia-wt plants were either kept at 65% RH or shifted for one week to 95% RH prior to infection. They were then infected with *P. syringae* DC3000 at OD600 = 0.04. 10 hpi HR formation was assessed by Trypan Blue staining. (B) Electrolyte leakage of leaf discs from plants grown at 65% RH (open bars) and 95% RH (gray bars) 10 hpi (Average of 25 leaves). Student's T-test shows significant difference between *AvrRpt2* 65% and RH95%. (C) Bacterial growth count. Experiments were done two times with similar results.

### Suppl. Figure 3

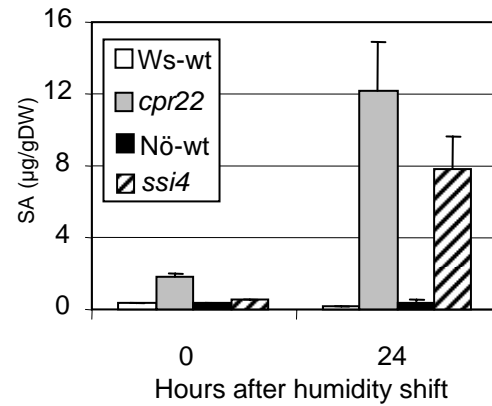

**Supplemental Figure 3.** SA increase after humidity shift in *cpr22* and *ssi4*. SA levels in *Ws-wt* (open bars) *cpr22* (gray bars), *Nö-wt* (black bar) and *ssi4* (hatched bar) at 0 and 24 hours after the shift from 95% RH to 65% RH conditions were measured. Student's T-test shows significant difference between *cpr22* and *Ws-wt*, and between *ssi4* and *Nö-wt* plants.

## Suppl. Figure 4

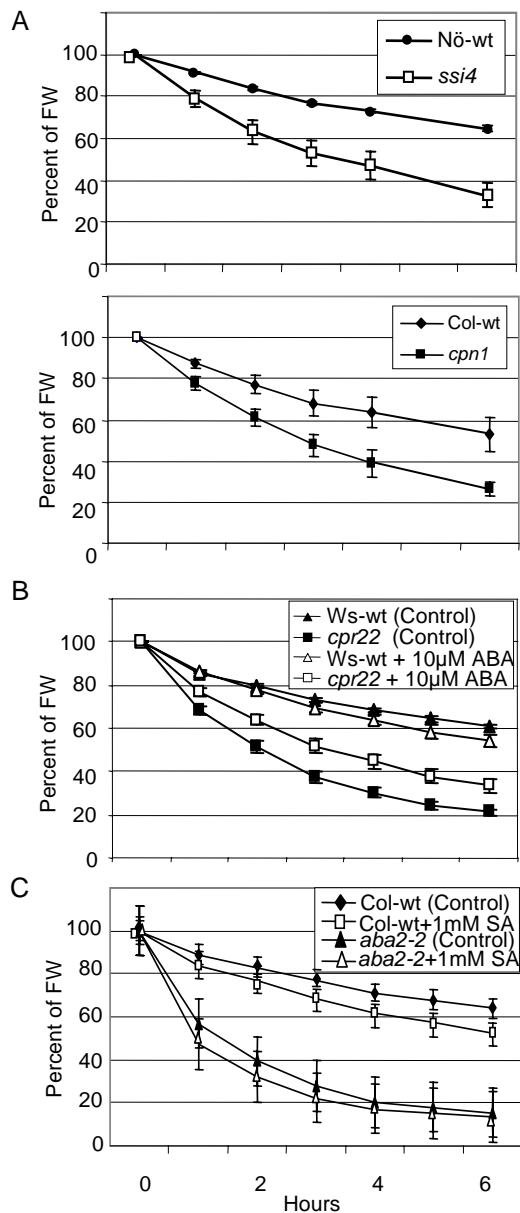

**Supplemental Figure 4.** Water loss phenotypes in various mutants and treatments. Plants were weighed at various times after detachment from their roots. (A) *ssi4* (open square), Nö-wt (filled circle), Col-wt (filled diamond) and *cpr1* (filled square); (B) Ws-wt plants after soil drenching with control solution (filled triangle) or with 10µM ABA (open triangle), *cpr22* heterozygous plants after soil drenching with control solution (filled square), or with 10µM ABA (open square), (C) *aba2-2* 16h after soil drenching with control solution (closed diamond), or with 1mM SA (open square). Col-wt 16h after soil drenching with control solution (filled triangle) or with 1mM SA (open triangle). All experiments were repeated at least three times with similar results. Control solution: 0.1% MeOH in water that was used to dissolve ABA or SA.

## Suppl. Figure 5

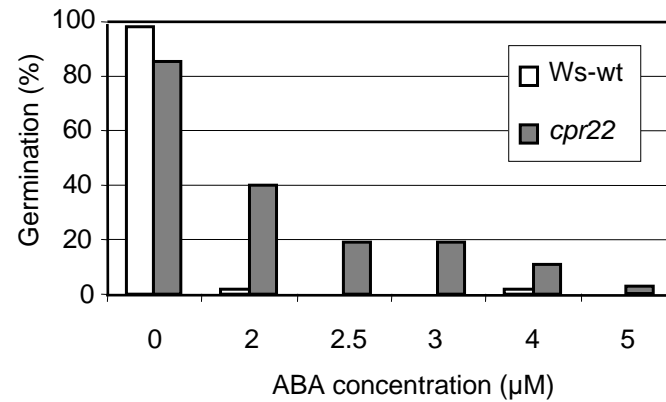

### Supplemental Figure 5.

Effect of higher concentrations of ABA on germination of Ws-wt (open bars) and *cpr22* (gray bars) seeds. Experiment was conducted with approximately 100 seeds in one plate. The experiment has been repeated more than three times with similar results.



## Suppl. Figure 6

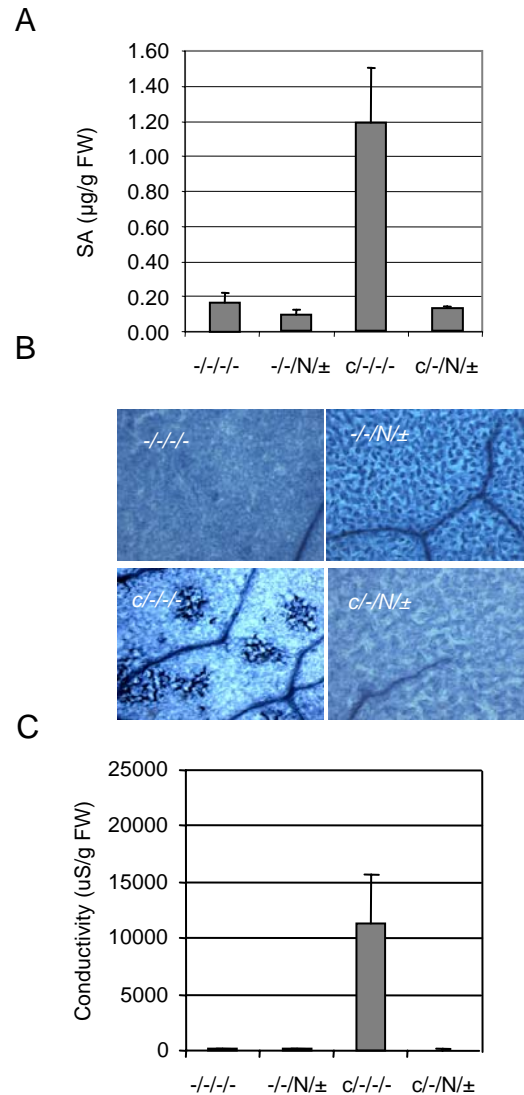

**Supplemental Figure 6.** *nahG* transgene suppresses SA levels and cell death formation after humidity shift in *cpr22*. Nö-wt, Ws-wt, Nö-*nahG*, *cpr22* (heterozygous), F2 progeny of cross pollination of *nahG* transgenic (Nö background) and *cpr22* (Ws background) plants were used (*c/-/-*; plants that are heterozygous for *cpr22*, but do not carry *nahG*, *c/-/N±*; plants that are heterozygous for *cpr22* and carry *nahG*). All plants were grown under 95% RH conditions and then shifted to 65% RH conditions. (A) SA levels. Student's T-test shows significant difference between *c/-/-* and *c/-/N±*. (B) Trypan Blue staining for cell death detection 2 days after shift, (C) Electrolyte leakage of leaf discs 2 days after shift. Experiments were done three times with similar results.

## Suppl. Figure 7

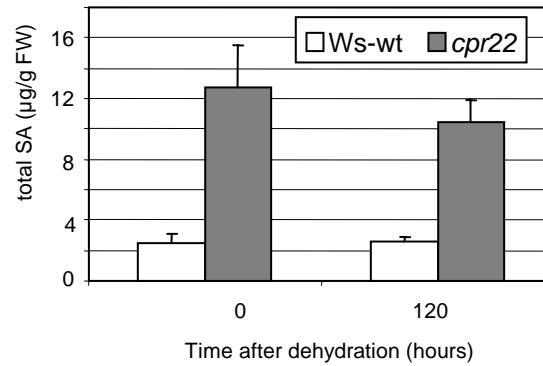

### Supplemental Figure 7

*cpr22* plants did not show significant changes in SA accumulation under moderate drought stress. *Ws-wt* (open bars), *cpr22* heterozygous plants (gray bars). The data represent the mean levels of three extracts. Each extract was made from 3-5 plants. The experiment has been repeated three times with similar results.

**Supplemental Table1: Fold differences in *cpr22/ssi4* (compared to wt) of ABA- and Defense/SA-related genes at high humidity (95%) and 24 hours after shift to ambient humidity (65%).** (Microarrays were preprocessed together using GC-robust multiarray analysis (gcrma) (Wu et al., 2004). Expression data were filtered to remove probe sets with low expression and low variance across all arrays (genefilter, Gentleman et al., 2009; minimum intensity of 100, on a minimum of 25% of arrays, and minimum interquartile range of 0.5 on the log2 scale).

| Gene Annotation                        | probe ID    | Gene ID                 | <i>cpr22</i> |       |                  |       | <i>ssi4</i>  |       |                  |       |
|----------------------------------------|-------------|-------------------------|--------------|-------|------------------|-------|--------------|-------|------------------|-------|
|                                        |             |                         | before shift |       | 24 h after shift |       | before shift |       | 24 h after shift |       |
|                                        |             |                         | Exp.1        | Exp.2 | Exp.1            | Exp.2 | Exp.1        | Exp.2 | Exp.1            | Exp.2 |
| <b><i>ABA-related genes</i></b>        |             |                         |              |       |                  |       |              |       |                  |       |
| <i>NCED3</i>                           | 257280_at   | At3g14440               | 0.6          | 0.3   | 10.5             | 7.4   | 1.3          | 1.2   | 8.5              | 3.1   |
| <i>AAO3</i>                            | 263570_at   | At2g27150               | 2.2          | 2.9   | 3.1              | 4.0   | 1.8          | 1.1   | 4.9              | 2.3   |
| <i>ERA1</i>                            | 249405_at   | At5g40280               | 1.7          | 1.5   | 3.0              | 2.5   | 1.1          | 1.0   | 2.7              | 2.1   |
| <i>ABI1</i>                            | 253994_at   | At4g26080               | 1.2          | 1.0   | 3.9              | 3.0   | 2.2          | 0.8   | 5.0              | 1.9   |
| <i>HAB1</i>                            | 259922_at   | At1g72770               | 0.8          | 0.9   | 3.1              | 2.8   | 1.1          | 1.0   | 2.8              | 1.8   |
| <i>PP2c</i>                            | 247723_at   | At5g59220               | 1.9          | 0.6   | 52.3             | 37.2  | 1.3          | 0.9   | 41.4             | 5.6   |
| <i>ANAC072_RD26</i>                    | 253872_at   | At4g27410               | 0.6          | 0.8   | 5.7              | 4.2   | 3.4          | 1.4   | 8.0              | 3.2   |
| <i>RD20</i>                            | 255795_at   | At2g33380               | 0.9          | 0.6   | 4.5              | 6.1   | 1.9          | 0.6   | 2.9              | 1.5   |
| <i>CYP707A4</i>                        | 257035_at   | At3g19270               | 3.2          | 1.1   | 9.9              | 9.3   | 0.9          | 1.5   | 2.7              | 2.2   |
| <i>Snrk3.22</i>                        | 255872_at   | At2g30360               | 0.9          | 2.2   | 2.5              | 3.0   | 1.5          | 1.5   | 4.0              | 1.7   |
| <i>PYR1</i>                            | 254705_at   | At4g17870               | 0.7          | 0.4   | 0.3              | 0.2   | 1.0          | 1.0   | 0.5              | 0.6   |
| <i>PYL2</i>                            | 248865_at   | At5g46790               | 0.9          | 0.7   | 0.6              | 0.4   | 0.8          | 0.9   | 0.4              | 0.6   |
| <i>PYL4</i>                            | 267034_at   | At2g38310               | 1.1          | 1.2   | 0.6              | 0.4   | 1.1          | 1.1   | 0.5              | 0.7   |
| <i>AtMYC2_RD22BP1</i>                  | 261713_at   | At1g32640               | 0.9          | 0.6   | 1.2              | 1.1   | 1.9          | 0.8   | 1.6              | 0.9   |
| <i>ABF3_DPB5</i>                       | 253263_at   | At4g34000               | 0.7          | 0.8   | 1.1              | 2.3   | 1.3          | 0.8   | 1.6              | 1.5   |
| <i>ABF4</i>                            | 258026_at   |                         | 1.0          | 1.1   | 2.2              | 1.3   | 1.9          | 0.8   | 1.4              | 1.4   |
| <i>RD22</i>                            | 246908_at   | At5g25610               | 0.6          | 0.7   | 0.05             | 0.1   | 1.2          | 1.0   | 0.5              | 0.5   |
| <i>RD29A</i>                           | 248337_at   | At5g52310               | 0.4          | 0.5   | 0.2              | 0.6   | 1.6          | 0.6   | 1.9              | 1.0   |
| <i>ERD3</i>                            | 254563_at   | At4g19120               | 1.5          | 2.9   | 0.5              | 0.8   | 0.8          | 0.8   | 0.4              | 0.5   |
| <i>KIN1/KIN2</i>                       | 246481_s_at | At5g15960/<br>At5g15970 | 0.8          | 0.8   | 0.5              | 0.5   | 1.3          | 1.0   | 2.0              | 0.9   |
| <b><i>Defense/SA-related genes</i></b> |             |                         |              |       |                  |       |              |       |                  |       |
| <i>WRKY70</i>                          | 251705_at   | At3g56400               | 1.0          | 1.7   | 8.8              | 5.1   | 1.8          | 1.1   | 9.2              | 3.2   |
| <i>EDS1</i>                            | 252373_at   | At3g48090               | 5.9          | 10.3  | 7.9              | 13.9  | 1.5          | 1.1   | 7.2              | 3.1   |
| <i>PAD4</i>                            | 252060_at   | At3g52430               | 15.4         | 24.4  | 76.5             | 62.6  | 0.7          | 1.5   | 74.4             | 5.3   |
| <i>PR-1</i>                            | 266385_at   | At2g14610               | 18.1         | 19.5  | 78.2             | 45.1  | 2.3          | 1.0   | 19.6             | 4.1   |
| disease resistance gene<br>"SSI4"      | 249264_s_at | At5g41740/<br>At5g41750 | 3.8          | 3.0   | 9.3              | 9.9   | 1.1          | 0.9   | 8.8              | 3.5   |
| disease resistance gene                | 249393_at   | At5g40170               | 1.6          | 2.0   | 7.2              | 5.9   | 1.1          | 0.8   | 2.2              | 1.6   |
| disease resistance gene                | 254851_at   | At4g12010               | 1.9          | 3.6   | 4.2              | 6.8   | 1.4          | 1.1   | 2.7              | 1.9   |
| <i>ICS1_EDS16_SID2</i>                 | 262177_at   | At1g74710               | 14.0         | 30.0  | 16.7             | 33.3  | 1.0          | 1.6   | 22.5             | 4.9   |
| <i>SID1_EDS5</i>                       | 252921_at   | At4G39030               | 75.8         | 96.2  | 152.8            | 280.4 | 1.7          | 2.0   | 74.5             | 7.0   |

**Supplemental Table 2** Primer sequences

| Experiment                                               | Gene            | Primer name             | Sequence                              |                               |
|----------------------------------------------------------|-----------------|-------------------------|---------------------------------------|-------------------------------|
| Real Time PCR                                            | <i>RD29A</i>    | rd29A-F                 | 5'-TGGATCTGAAGAACGAATCTGATATC-3'      |                               |
|                                                          |                 | rd29A-R                 | 5'-GGTCTTCCCTTCGCCAGAA-3'             |                               |
|                                                          | <i>KIN1/2</i>   | KIN1-F                  | 5'-ACCAACAAGAATGCCTTCCA-3'            |                               |
|                                                          |                 | KIN1-R                  | 5'- CCGCATCCGATACACTCTTT-3'           |                               |
|                                                          | <i>NCED3</i>    | NCED3-F                 | 5'- CCGGTGGTTTACGACAAGAA-3'           |                               |
|                                                          |                 | NCED3-R                 | 5'- CCCAAGCGTTCCAGAGATG-3'            |                               |
|                                                          | <i>PP2C</i>     | PP2C-F                  | 5'- TGGAGATCCGGAGGTTTAAG-3'           |                               |
|                                                          |                 | PP2C-R                  | 5'- TCTCCTCCGCCTCTGTAAGT-3'           |                               |
|                                                          | <i>AAO3</i>     | AAO3-F                  | 5'-GAAGGTCTTGAAACACGAAGAA-3'          |                               |
|                                                          |                 | AAO3-R                  | 5'-GAAATACACATCCCTGGTGTACAAAAC-3      |                               |
|                                                          | <i>18SrRNA</i>  | 18s rRNA-F              | 5'- AAACGGCTACCACATCCAAG-3'           |                               |
|                                                          |                 | 18s rRNA-R              | 5'- CCTCCAATGGATCCTCGTTA-3'           |                               |
|                                                          | RT-PCR          | <i>RD29A</i>            | RD29A-F                               | 5'-ATTCCGGTGGGAGATCAAACCTC-3' |
|                                                          |                 |                         | RD29A-R                               | 5'-AACAGAATGTGGCGATTCTGGC-3'  |
| <i>RD29B</i>                                             |                 | RD29B-F                 | 5'-TGGGAAGAGACTTACCGACGGGAACATCATG-3' |                               |
|                                                          |                 | RD29B-R                 | 5'-CGGAGAGAGGTAGCTTTGTCATCACCGTTG-3'  |                               |
| <i>RAB18</i>                                             |                 | RAB18-F                 | 5'-TTCACCGCTCCGGATCTGGAT-3'           |                               |
|                                                          |                 | RAB18-R                 | 5'-GCTCATTACACACTCATGTAAGTA-3'        |                               |
| <i>ACT2</i>                                              |                 | ACT2-F                  | 5'-CTAAGCTCTCAAGATCAAAGGCTTA-3'       |                               |
|                                                          |                 | ACT2-R                  | 5'-TTAACATTGCAAAGAGTTTCAAGG-3'        |                               |
| Detection of the<br><i>AtCNGC11/12</i> chimera gene      |                 | D2-F1                   | 5'-GTTGCAACTGTGCATGATGG-3'            |                               |
|                                                          |                 | GSP14-R3                | 5'-TCATGAGATCCGGTTGTACTIONTTTCA-3'    |                               |
| Heterozygosity of the<br><i>AtCNGC11/12</i> chimera gene | D2DT-F1         | 5'-CTCTTGATCCCACTTCC-3' |                                       |                               |
|                                                          | D2DT-R1         | 5'-GACCGTGAGATTGCAGT-3' |                                       |                               |
| Detection of the <i>NahG</i> transgene                   | <i>NahG</i> -F2 | 5'-AAAGCCACCACGTTGAT    |                                       |                               |
|                                                          | <i>NahG</i> -R2 | 5'-ATCCAGGTACAGCTGTT    |                                       |                               |
